# Supplementary material for: Antifouling hydrogel film based on a sandwich array for salivary glucose monitoring
Source: Royal Society of Chemistry journal article supplement (doi:10.1039/d1ra03517g), 2021-01-01
Supplement: d1ra03517g1.pdf [file d1ra03517g1.pdf]

## Supplementary Information

### Antifouling Hydrogel Film Based on Sandwich Array for Salivary Glucose Monitoring

Zifeng Zhang,<sup>a, b</sup> Shiwen Wang,<sup>b</sup> Guanjiang Liu,<sup>b</sup> Debo Hu,<sup>b, c</sup> Bei Yang,<sup>b, c</sup> Qing Dai<sup>a, b, c</sup>, Qian Dou<sup>\*b</sup>

<sup>a</sup>School of Materials Science and Engineering, Zhengzhou University, Zhengzhou 450001, P. China

<sup>b</sup>Division of Nanophotonics, CAS Key Laboratory of Standardization and Measurement for Nanotechnology, CAS Center for Excellence in Nanoscience, National Center for Nanoscience and Technology, Beijing 100190, China

\*E-mail: [douq@nanoctr.cn](mailto:douq@nanoctr.cn);

<sup>c</sup>Center of Materials Science and Optoelectronics Engineering, University of Chinese Academy of Sciences, Beijing 100049, China

Fig. S1

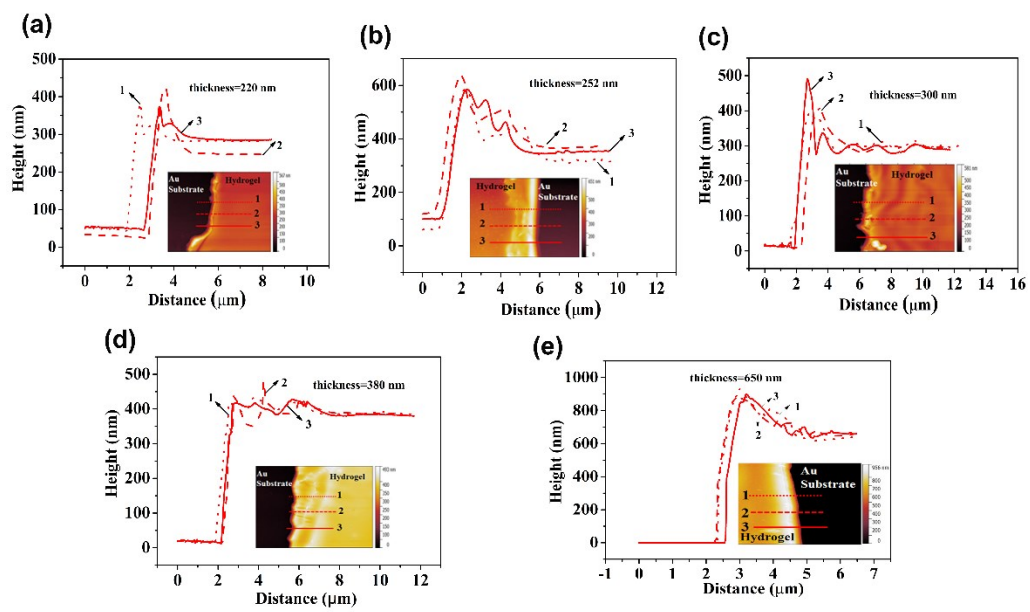

Fig. S1 The different thickness of HFSA obtained at different spinning speed.

Fig. S2

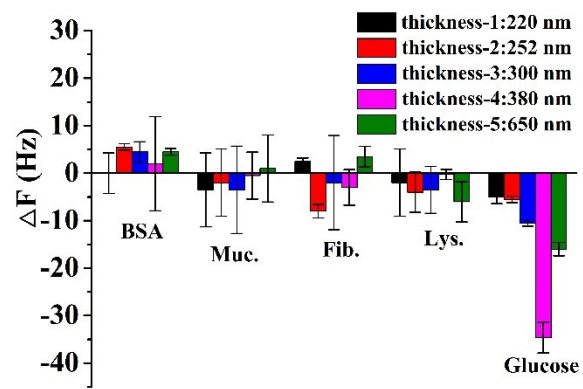

Fig. S2 Effect of thickness of HFSa on protein resistance and glucose sensitivity.

Fig. S3

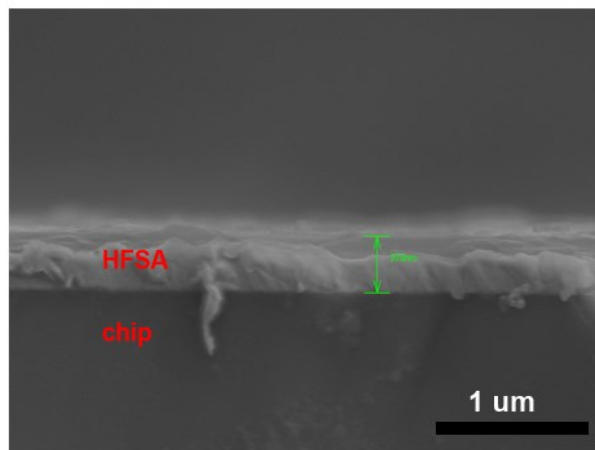

Fig. S3 The thickness of HFSA obtained by SEM.

**Fig. S4**

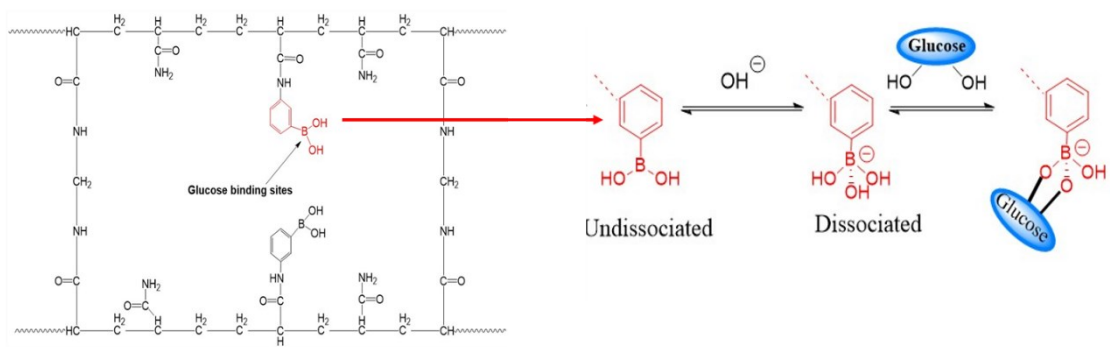

**Fig. S4** The mechanism of glucose recognition between phenylboronic acid and glucose molecules

Fig. S5

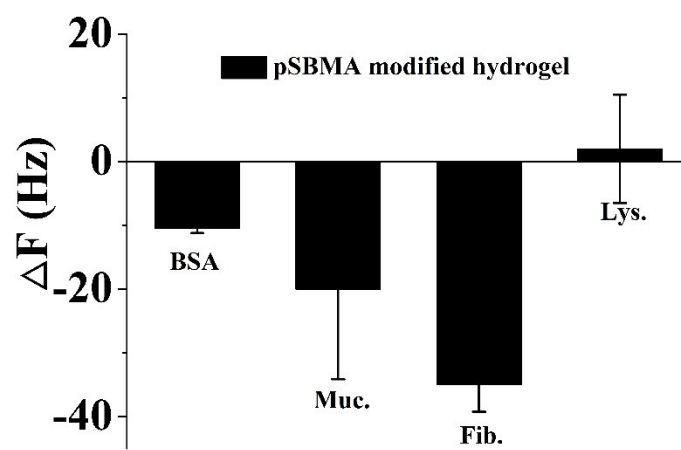

Fig. S5 The protein resistance of pSBMA modified hydrogel at polymerization time of 30 min.

Fig. S6

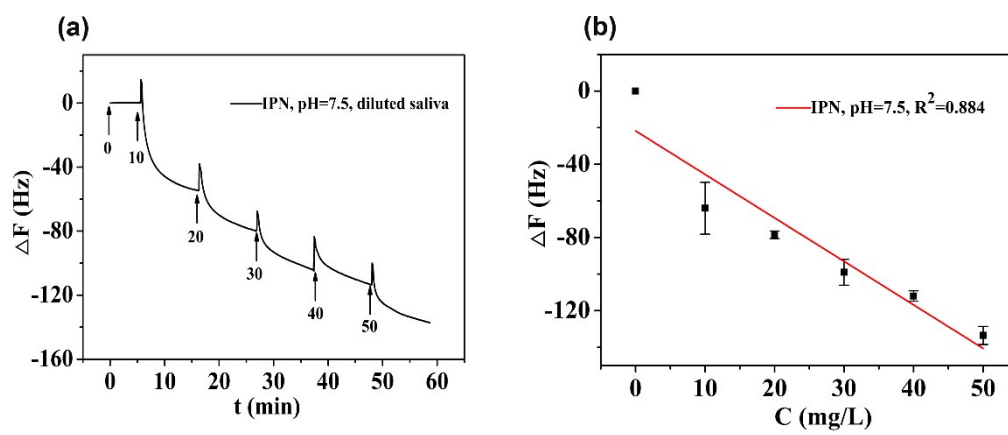

Fig. S6 (a) The detection of glucose in diluted saliva by IPN hydrogel film-coated QCM sensor. (b) Relationship between frequency shift and glucose concentration.

Fig. S7

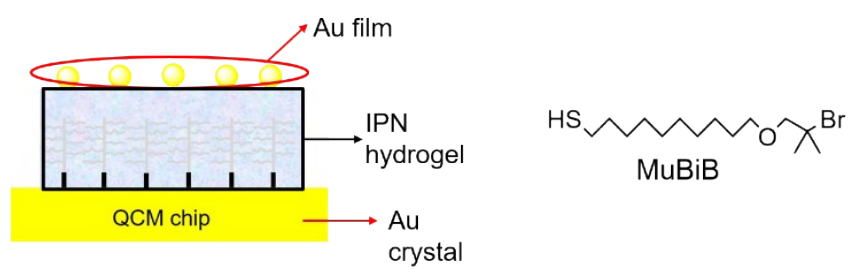

Fig. S7 Au film-coated IPN hydrogel



**Fig. S8**

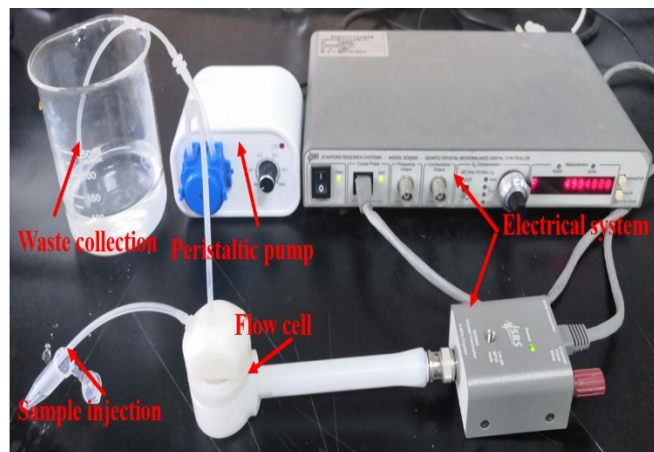

**Fig. S8** The photograph of system

**Table S1****Table S1.** Elemental surface composition of initiator on the IPN hydrogel and HFSA determined from XPS.

| Sample                        | Element (atom %) |        |       |       |       |       |        |
|-------------------------------|------------------|--------|-------|-------|-------|-------|--------|
|                               | C                | O      | S     | N     | Br    | B     | Au     |
| Initiator on the IPN hydrogel | 40.963           | 7.83   | 2.882 | ----- | 2.631 | ----- | 48.575 |
| HFSA                          | 60.324           | 15.821 | 4.347 | 3.437 | ----- | ----- | 16.07  |

**Table S2****Table S2.** The % RSD of IPN hydrogel film after eight association–dissociation cycles.

| Film         | Glucose level (mg/L) | Mean of glucose response (Hz) | Standard deviations | % RSD |
|--------------|----------------------|-------------------------------|---------------------|-------|
| IPN hydrogel | 10                   | 7.9                           | 0.2                 | 2.5%  |
| HFSA         | 10                   | 11.4                          | 0.49                | 4.3%  |

**Table S3****Table S3.** Elemental surface composition of IPN hydrogel determined from XPS.

| Sample       | Element (atom %) |        |       |        |       |       |       |
|--------------|------------------|--------|-------|--------|-------|-------|-------|
|              | C                | O      | S     | N      | Br    | B     | Au    |
| IPN hydrogel | 69.623           | 16.733 | 0.162 | 12.167 | ----- | 1.315 | ----- |

**Table S4**

**Table S4** Comparison of analytical properties of the QCM sensor with previous reports for glucose detection

| Glucose-responsive material | Detection range | Limit of detection     | Response time | Specimen                              | Reference |
|-----------------------------|-----------------|------------------------|---------------|---------------------------------------|-----------|
| PBA                         | 10 – 5994 mg/L  | -----                  | 100 s         | 7.5 PBS                               | 1         |
| ConA                        | 1.8 – 1350 mg/L | 0.9 mg/L (3 $\delta$ ) | -----         | Distilled water, cattle serum         | 2         |
| PBA                         | 900 – 9000 mg/L | -----                  | -----         | 9.0 PBS                               | 3         |
| CP                          | 1.8 – 3600 mg/L | -----                  | 30 min        | 7.4 PBS, 10% human serum              | 4         |
| PBA                         | 1 – 36 mg/L     | 1 mg/L                 | 5 min         | 7.5 PBS                               | 5         |
| PBA                         | 0 – 50 mg/L     | 10 mg/L                | 2 min         | 7.5 PBS, 10% saliva, 1% diluted serum | 6         |
| PBA                         | 0 – 160 mg/L    | 3 mg/L                 | 10 min        | PBS, artificial saliva                | 7         |
| PBA                         | 0 – 40 mg/L     | 5 mg/L                 | 5 min         | PBS, 50% saliva                       | 8         |
| PBA                         | 0 – 50 mg/L     | 3 mg/L                 | 5 min         | PBS, 10% saliva                       | Our work  |

## Reference:

1. Q. Dou, D. B. Hu, H. K. Gao, Y. M. Zhang, A. K. Yetisen, H. D. Butt, J. Wang, G. J. Nie and Q. Dai, *RSC Adv.*, 2017, 7, 41384-42390.
2. D. P. Tang, Q. F. Li, J. Tang, B. L. Su and G. N. Chen, *Anal. Chim. Acta.*, 2011, 686, 144-149.
3. C. Sugnaux, H. A. Klok, *Macromol. Rapid Commun*, 2014, 35, 1402-1407.
4. C. Li, X. Chen, F. Y. Zhang, X. X. He, G. Z. Fang, J. F. Liu and S. Wang, *Anal. Chem.*, 2017, 89, 10431-10438.
5. Z. Z. Zhang, Q. Dou, S. W. Wang, D. B. Hu, X. D. Guo, B. X. Liao, Z. P. Zhao, H. L. Liu and Q. Dai, *J. Mater. Chem. C*, 2020, 8, 9655-9662.
6. Z. Z. Zhang, Q. Dou, S. W. Wang, D. B. Hu, B. Yang, Z. P. Zhao, H. L. Liu, Q. Dai, *Nanoscale*, 2020, 12, 22787-22797.
7. Q. Dou, Z. F. Zhang, Y. X. Wang, S. W. Wang, D. B. Hu, Z. P. Zhao, H. L. Liu and Q. Dai, *ACS Appl. Mater. Interfaces*, 2020, 12, 34190-34197.
8. Q. Dou, S. W. Wang, Z. F. Zhang, Y. X. Wang, Z. P. Zhao, H. J. Guo, H. L. Liu and Q. Dai, *Nanoscale*, 2020, 12, 19317-19324.
